# Supplementary material for: Immunofluorescence identifies distinct subsets of endothelial cells in the human liver
Source: PubMed Central journal article supplement (PMC5347010; doi:10.1038/srep44356), 2017-03-13
Supplement: srep44356-s1.pdf [file srep44356-s1.pdf]

## **Supplementary Material**

Title: Immunofluorescence identifies distinct subsets of endothelial cells in the human liver.

Short title: The Human Liver Endothelial cells.

### **Table of Contents**

|                                                                                      |           |
|--------------------------------------------------------------------------------------|-----------|
| <b>Supplementary Figure 1</b>                                                        | <b>4</b>  |
| <b>Supplementary Figure 2</b>                                                        | <b>6</b>  |
| <b>Supplementary Figure 3</b>                                                        | <b>8</b>  |
| <b>Supplementary Figure 4</b>                                                        | <b>11</b> |
| <b>Supplementary Tables</b>                                                          | <b>12</b> |
| <b>Table 1 Patient details</b>                                                       | <b>12</b> |
| <b>Table 2 Antibodies used</b>                                                       | <b>13</b> |
| <b>Table 3 Number of biological replicates performed for each antigen presented.</b> | <b>14</b> |
| <b>Table 4 - Findings comparing fluorescence in LSEC makers between zones.</b>       | <b>15</b> |
| <b>Table 5 - Findings comparing intensity of fluorescence in PT and CV makers.</b>   | <b>15</b> |

### **List of investigators**

1st and corresponding Author.

Otto Strauss, MBChB, PhD(1,2,3).

Department of Surgery, Faculty of Medical Health Sciences, University of Auckland, Level 12 Support Building, Auckland Public Hospital, Park Road, Auckland.

Contribution: Designed experiments, acquired and analysed data, wrote

manuscript.

2<sup>nd</sup> Author

Anthony Phillips, MBChB, PhD(1,2,3).

Contribution: Provided intellectual input regarding manuscript structure and study design. Reviewed manuscript. Supervised work.

3<sup>rd</sup> Author

Katya Ruggiero, PhD (4).

Contribution: Performed all the statistical analysis presenting in the supplementary information.

4<sup>th</sup> Author

Adam Bartlett, MBChB, PhD(1,2,5).

Contribution: Provided intellectual input regarding manuscript structure and study design. Reviewed manuscript. Supervised work.

5<sup>th</sup> Author

P. Rod Dunbar, MBChB, PhD(2,3,5).

Contribution: Provided intellectual input regarding manuscript structure and study design. Reviewed manuscript. Supervised work.

<sup>1</sup>Department of Surgery, Faculty of Medical Health Sciences, University of

Auckland, Auckland, New Zealand.

<sup>2</sup>Maurice Wilkins Centre, University of Auckland, Auckland, New Zealand

<sup>3</sup>School of Biological Sciences, Faculty of Science, University of Auckland,  
Auckland, New Zealand

<sup>4</sup>Department of Statistics, University of Auckland, Auckland, New Zealand

<sup>5</sup>These authors contributed equally.

## Supplementary Figure 1

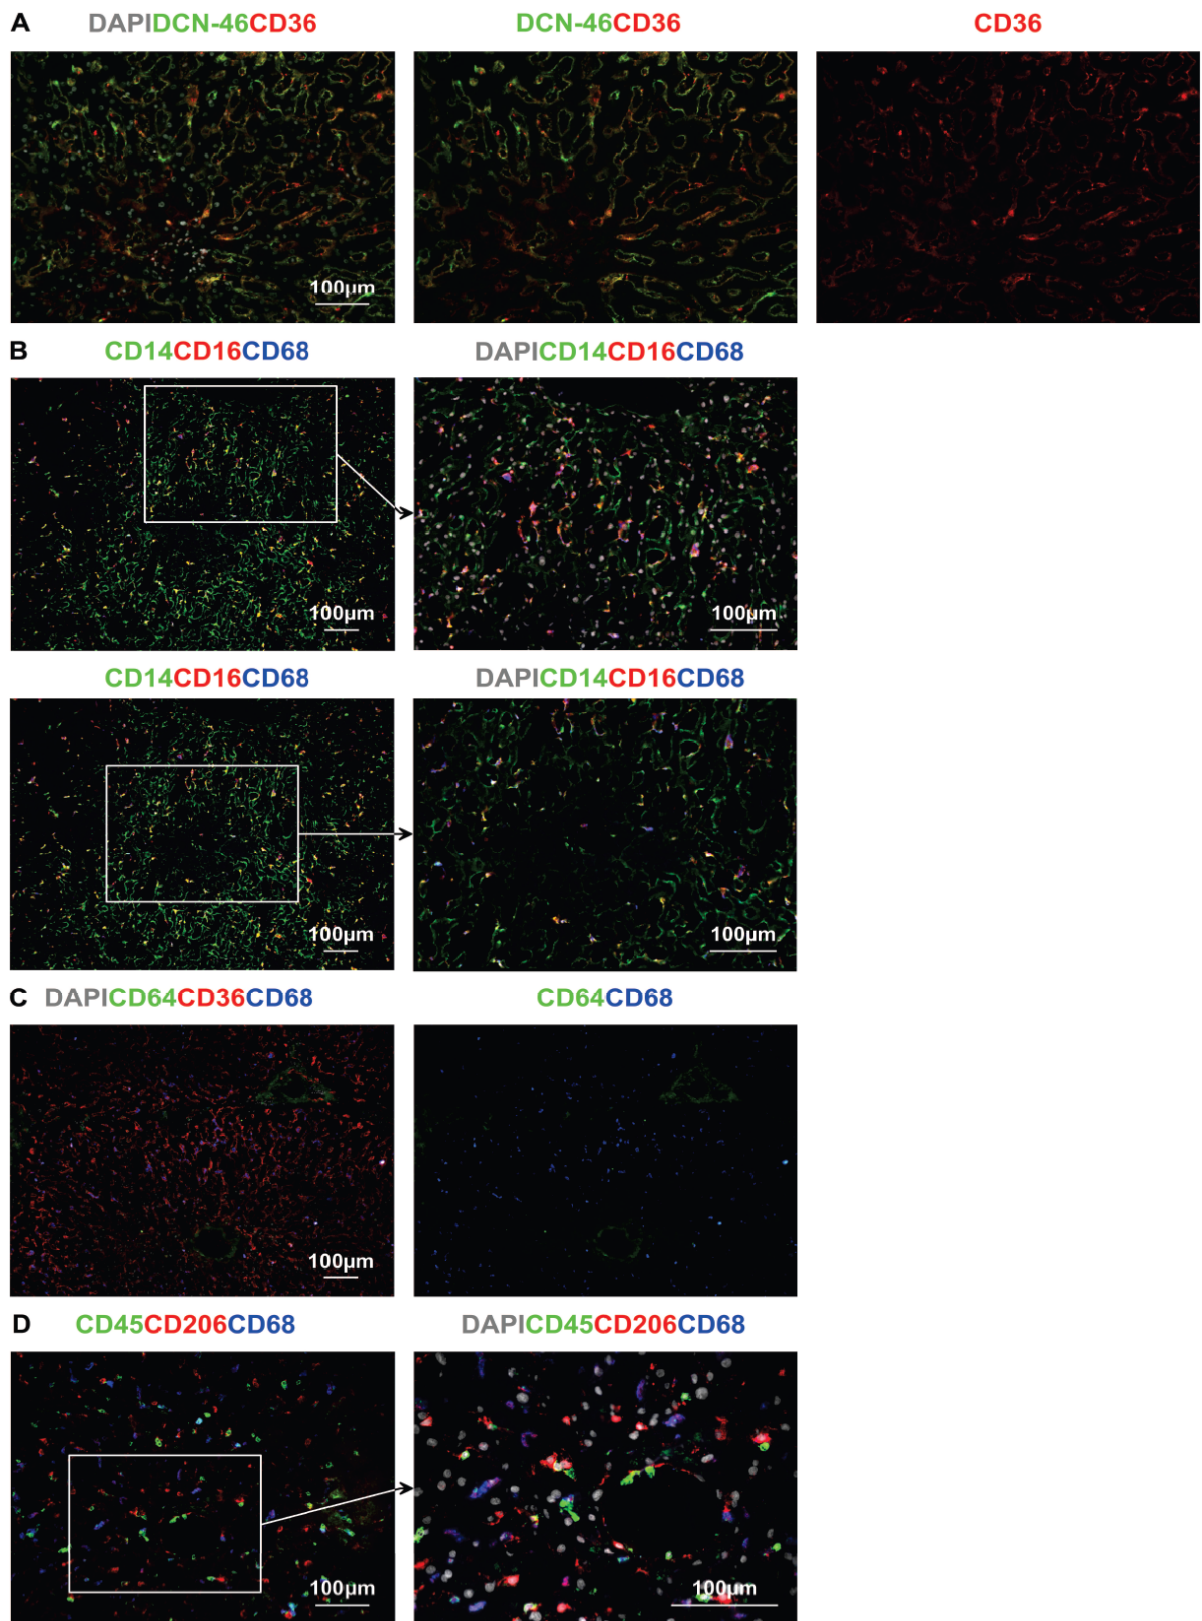

### Supplementary Fig. 1

(A) DCN-46, a marker for CD299 is expressed by LSEC in Z2 and Z-3 as

identified by CD36 staining. (B) When assessed with other FcReceptors besides CD32, LSEC are predominantly negative for CD16. CD16 is highly expressed by CD68<sup>+</sup> KC.(C) LSEC are also negative for CD64. (D) CD206 is expressed by both CD68<sup>+</sup> KC and CD45<sup>-</sup>CD68<sup>-</sup> cells that are likely to be LSEC. This expression does not appear to be present in Z1 which would be in keeping with Type 2 LSEC.

## Supplementary Figure 2

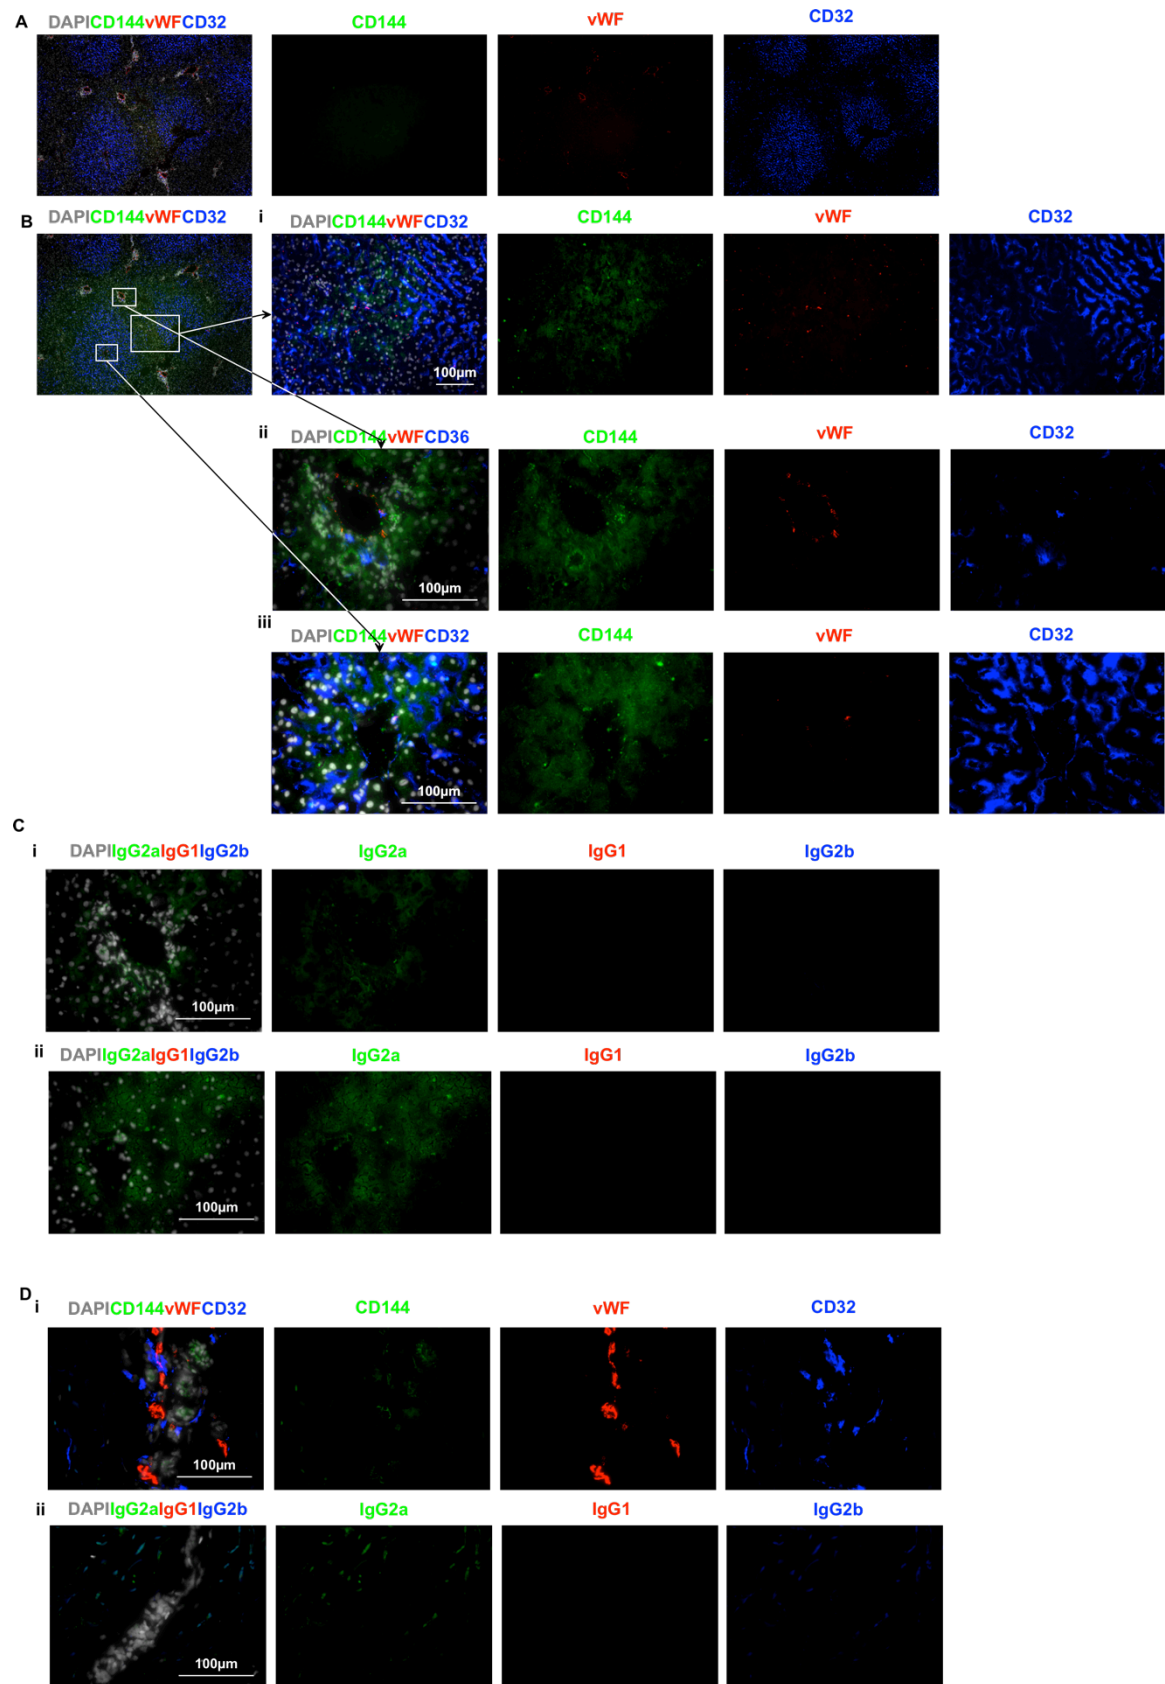

## **Supplementary Fig. 2**

This image highlights that von Willebrand Factor (vWF) is brightly expressed on the luminal surface of PT vessels and also present in the luminal surface of CV (see B - ii, B - iii). CD144 was dimly expressed by cells in the PT, this was more marked on smaller structures that have a morphology consistent with hepatic arteries (B - ii). This pattern of staining is distinct from the non-specific pattern of autofluorescence seen in the negative control samples of PT(C - i) and CV(C - ii) which did not undergo incubation with primary antibodies. Skin biopsy tissue was used as a positive control for both vWF and CD144 as both are expressed by vascular endothelial cells in the dermis (D - i), this staining pattern is distinct from the non-specific pattern of autofluorescence seen in the negative control sample (D - ii) of skin. vWF and CD144 both appear to be more prominent on vascular structures in the dermis than liver blood vascular endothelial cells. All images were acquired in exactly the same manner, using the same camera exposure times, and post-capture analysis. All samples in this image underwent exactly the same staining procedure in the same experiment.

# Supplementary Figure 3

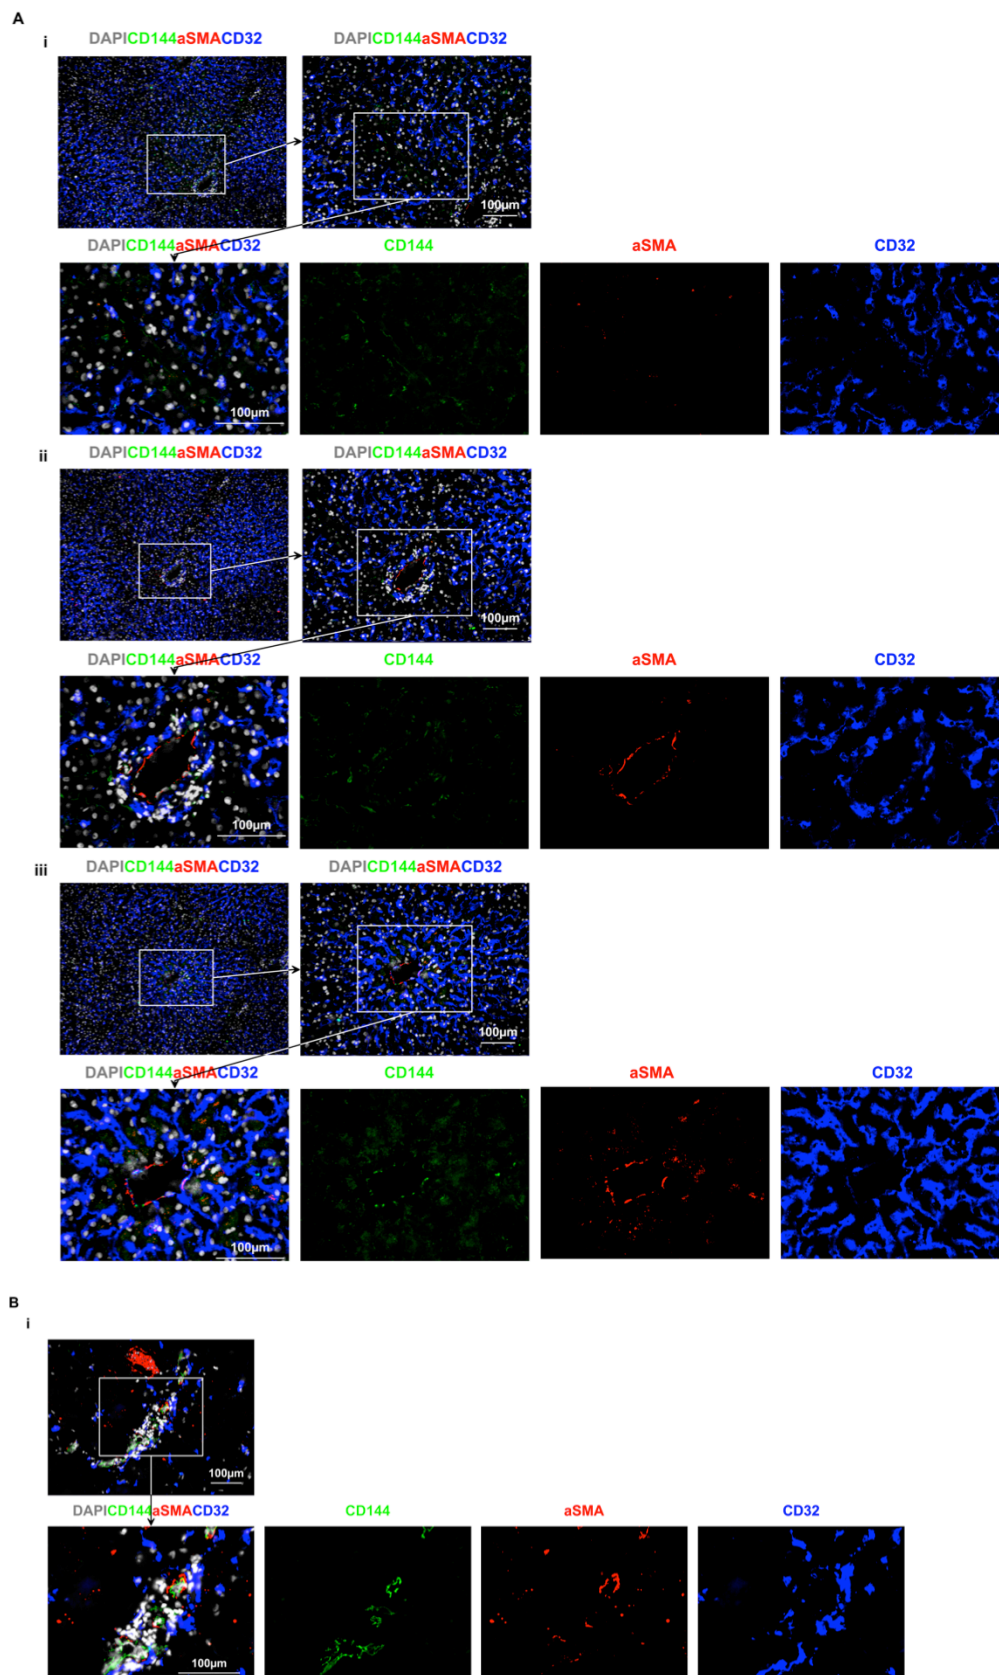



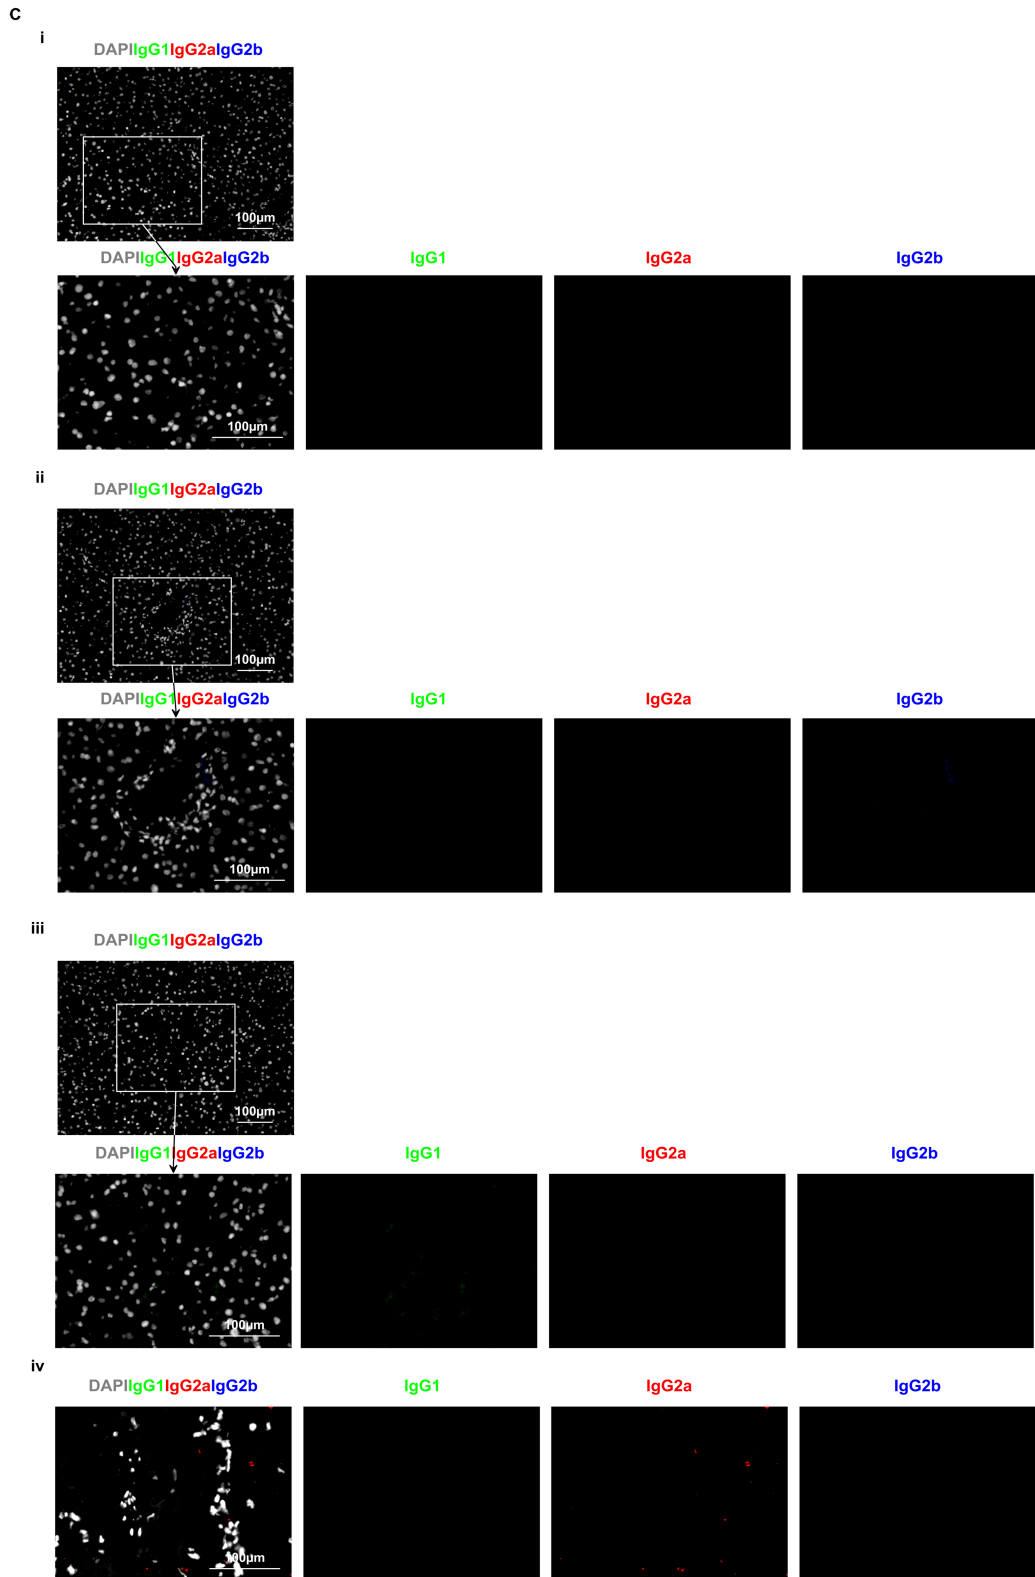

### Supplementary Fig. 3

This figure presents images acquired following incubation with the IgG1 anti-CD144 isotype. (A) shows staining patterns characteristic of Z1(A – i), PT (A – ii), and CV (A- iii) areas. Similar to the IgG2a anti-CD144 isotype (Biolegend 348502

see Supplementary Fig. 2) there is expression on CV and PT structures as well weak expression by cells in Z1, and inconsistent and variable expression throughout the lobule. The lobular expression does not follow a pattern and can only occasionally and inconsistently be seen on LSEC (identified through CD32 co-expression and as would be considered consistent with LSEC shape). This pattern of staining is distinct from the non-specific pattern of autofluorescence seen in the negative control samples of Z1 (C – i), PT(C - ii), and CV(C - ii) which did not undergo incubation with primary antibodies. Skin biopsy tissue was used as a positive control and is expressed by vascular endothelial cells in the dermis (B), this staining pattern is distinct from the non-specific pattern of autofluorescence seen in the negative control sample (C - iv) of skin. This appears to be more prominent on vascular structures in the dermis than liver blood vascular endothelial cells. All images were acquired in exactly the same manner, using the same camera exposure times, and post-capture analysis. All samples in this image underwent exactly the same staining procedure in the same experiment.

## Supplementary Figure 4

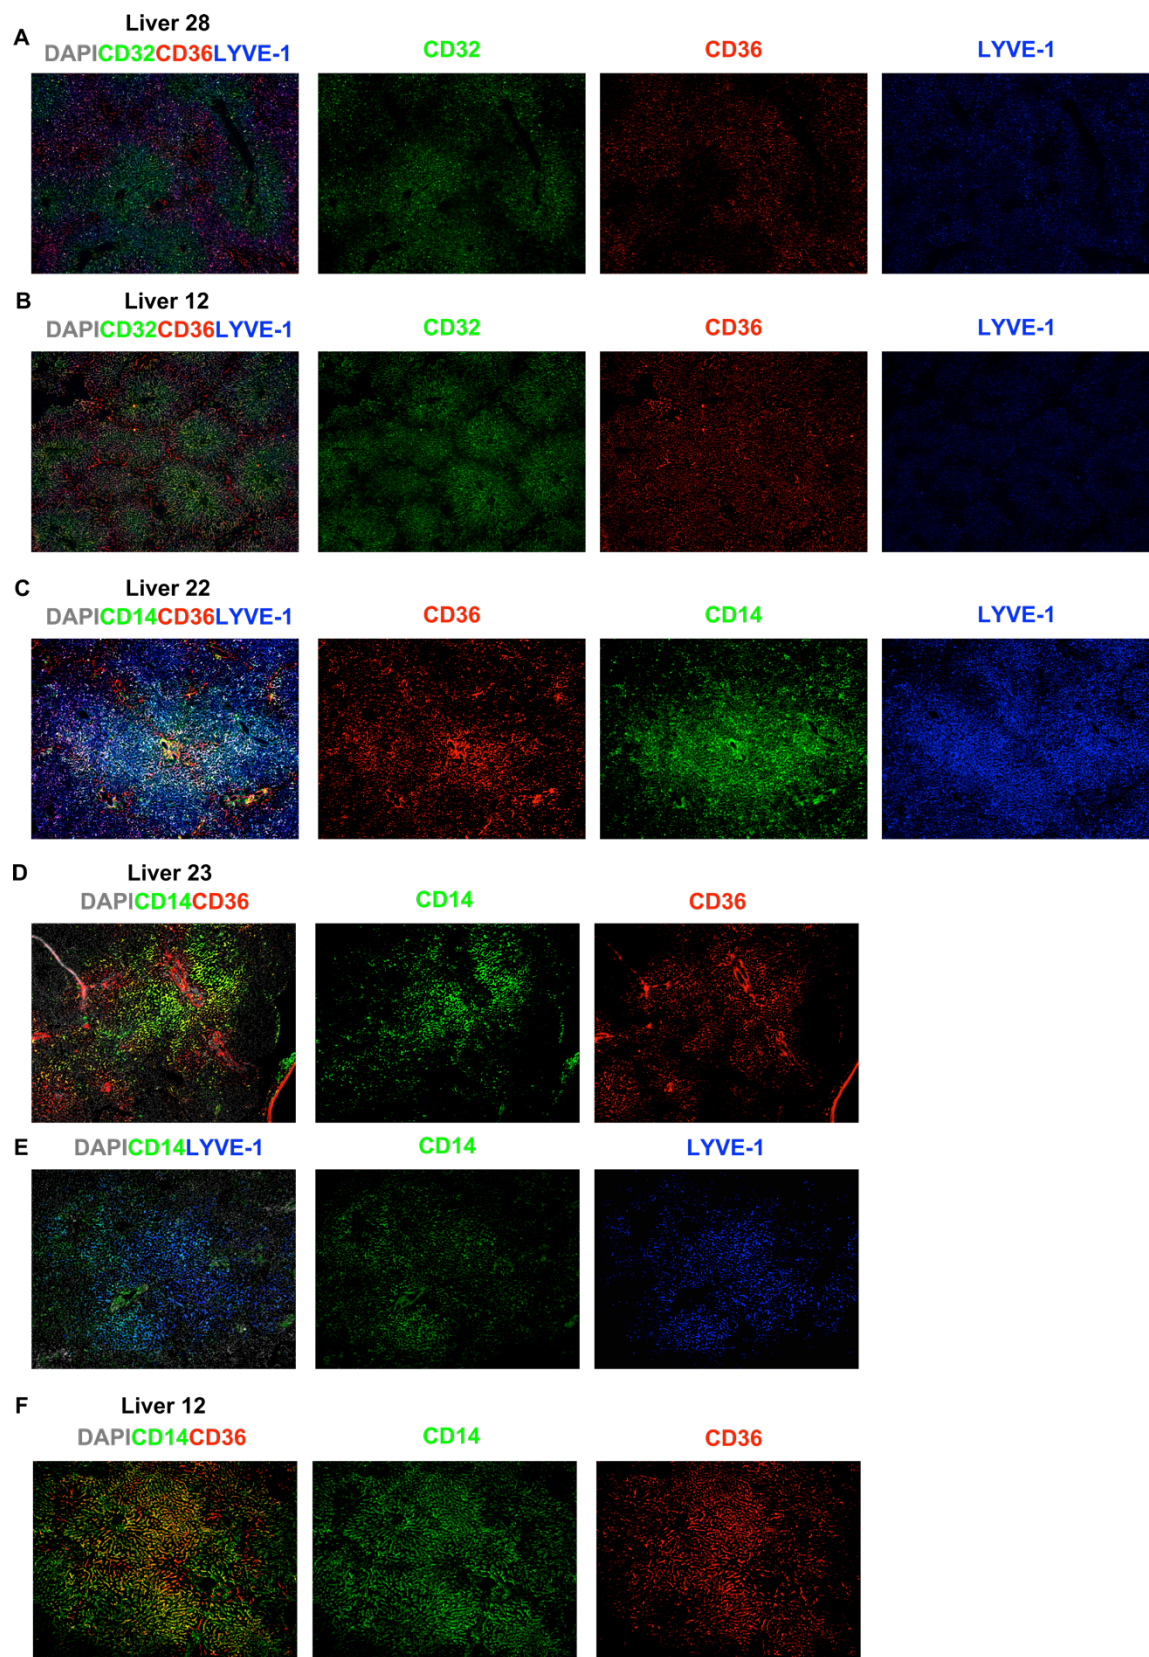

## Supplementary Figure 4

The pattern of Type 1 and Type 2 LSEC was present in all livers assessed. This

figure shows more examples of each when assessing CD36(A, B, C, D, F), CD14 (C, E, F), CD32 (A, B) and Lyve 1(A, B, C, E). D and E are both Liver 23. This is supporting evidence to highlight that the findings presented with found in a minimum of 3 biological replicates, and all samples assessed.

## Supplementary Tables

**Table 1 Patient details**

| Patient  | Age | Sex | Details                                     | Organ |
|----------|-----|-----|---------------------------------------------|-------|
| <b>1</b> | 38  | F   | Resection of haematoma secondary to adenoma | Liver |
| <b>2</b> | 29  | M   | Living Donor LT                             | Liver |
| <b>3</b> | 21  | M   | Living Donor LT                             | Liver |
| <b>4</b> | 21  | F   | Living Donor LT                             | Liver |
| <b>5</b> | 53  | F   | Liver resection to remove cyst              | Liver |
| <b>6</b> | 50  | F   | Liver resection of cyst adenoma             | Liver |
| <b>7</b> | 46  | F   | Liver resection of adenoma                  | Liver |
| <b>8</b> | 63  | M   | Liver Resection for haemangioma             | Liver |
| <b>9</b> | 56  | F   | Abdominoplasty                              | Skin  |

|    |    |   |                  |      |
|----|----|---|------------------|------|
| 10 | 61 | F | Breast reduction | Skin |
|----|----|---|------------------|------|

**Table 2 Antibodies used**

| Target              | Species | Clone    | Brand          | Cat #    | IF-<br>Frozen | IF-<br>Paraffin |
|---------------------|---------|----------|----------------|----------|---------------|-----------------|
| aSMA                | Mouse   | 1a4      | Cellmarque     | CM202M95 | Y             | Y               |
| CD13                | Rabbit  | SP187    | CellMarque     | CM113R15 | Y             | Y               |
| CD14                | Rabbit  | SP192    | Abcam          | ab183322 | Y             | Y               |
| CD14                | Mouse   | MEM-18   | Serotec        | MCA2185  | Y             | N               |
| CD16                | Rabbit  | SP175    | Cellmarque     | CM116R14 | Y             | Y               |
| CD31                | Mouse   | JC70     | CellMarque     | CM131M94 | Y             | Y               |
| CD32                | Mouse   | FUN-2    | BioLegend      | 303201   | Y             | N               |
| CD34                | Rabbit  | EP373Y   | AbCam          | ab81289  | Y             | Y               |
| CD36                | Mouse   | 185-1G2  | AbCam          | ab76521  | Y             | N               |
| CD45                | Mouse   | F10-89-4 | Abcam          | ab30470  | Y             | Y               |
| CD54                | Mouse   | LB-2     | BD Biosciences | 559047   | Y             | N               |
| CD64                | Mouse   | 10.1     | BioLegend      | 305002   | Y             | N               |
| CD68                | Mouse   | Y1/82A   | BD Biosciences | 556059   | Y             | N               |
| CD68                | Mouse   | Kp-1     | CellMarque     | 168M-94  | N             | Y               |
| CD105               | Mouse   | MRQ-14   | CellMarque     | 105M-14  | Y             | N               |
| CD144 (VE-cadherin) | Mouse   | BV9      | Biolegend      | 348502   | Y             | N               |
| CD144 (VE-cadherin) | Mouse   | 55-7H1   | BD             | 555661   | Y             | N               |
| CD146               | Rabbit  | EPR3208  | Abcam          | ab75769  | Y             | Y               |
| CD146               | Mouse   | P1H12    | BD Biosciences | 550314   | Y             | Y               |
| CD206               | Mouse   | 5C11     | AbCam          | ab117644 | Y             | Y               |

|                       |        |            |                |           |   |   |
|-----------------------|--------|------------|----------------|-----------|---|---|
| <b>CD209/299*</b>     | Mouse  | DCN46      | BD Biosciences | 551186    | Y | N |
| <b>CD299</b>          | Rabbit | Polyclonal | AbCam          | ab58603   | N | Y |
| <b>Cytokeratin 19</b> | Mouse  | A53-B/A2   | Biolegend      | 628502    | Y | Y |
| <b>Cytokeratin 19</b> | Rabbit | EP72       | MyBioSource    | MBS370050 | Y | Y |
| <b>Laminin 1+2</b>    | Rabbit | Polyclonal | Abcam          | ab7463    | Y | Y |
| <b>LYVE-1</b>         | Rabbit | Polyclonal | Abcam          | ab36993   | Y | Y |
| <b>vWF</b>            | Mouse  | 2F2-AP     | BD Biosciences | 555849    | Y | Y |

**Table 3 Number of biological replicates performed for each antigen presented.**

| <b>Antigen</b>            | <b>Number of donors observed</b> |
|---------------------------|----------------------------------|
| CD13                      | 4                                |
| CD14                      | 6                                |
| CD16                      | 3                                |
| CD31                      | 3                                |
| CD32                      | 6                                |
| CD34                      | 4                                |
| CD36                      | 8                                |
| CD54                      | 4                                |
| CD105                     | 4                                |
| CD144 (VE-cadherin)       | 3                                |
| CD146                     | 7                                |
| CD209/CD299/DC-SIGN       | 5                                |
| Alpha Smooth Muscle Actin | 4                                |
| Cytokeratin 19            | 4                                |
| LYVE-1                    | 6                                |
| Laminin 1+2               | 6                                |
| vWF                       | 3                                |

**Table 4 - Findings comparing fluorescence in LSEC makers between zones.**

| Marker | Difference | SED    | t       | LSD    | lwr     | upr     | p       | Ratio       | lwrRatio    | uprRatio    |
|--------|------------|--------|---------|--------|---------|---------|---------|-------------|-------------|-------------|
| CD14   | 0.1854     | 0.0384 | 4.8282  | 0.0789 | 0.1065  | 0.2643  | 0.0001  | 1.203699824 | 1.112377926 | 1.302518893 |
| CD32   | 0.4516     | 0.0447 | 10.1132 | 0.0918 | 0.3598  | 0.5434  | <0.0001 | 1.570823493 | 1.433042777 | 1.721851215 |
| CD36   | -0.1866    | 0.0555 | -3.3621 | 0.1141 | -0.3006 | -0.0725 | 0.0024  | 0.82977558  | 0.740373863 | 0.930065747 |
| LYVE1  | 0.6038     | 0.064  | 9.4412  | 0.1315 | 0.4724  | 0.7353  | <0.0001 | 1.829056024 | 1.603838791 | 2.086107731 |

Difference = mean Intensity Z3 - mean Intensity zone Z1

SED = standard error of the difference between the means

t = Difference/SED

LSD = least significant difference is the minimum absolute difference between a pair of means in order for them to be considered statistically significant at the 0.05 level.

lwr = Difference – LSD (lower limit of 95% confidence interval for difference between pair of means)

upr = Difference + LSD (upper limit of 95% confidence interval for difference between pair of means)

Note: if range of values between lwr and upr includes zero, usually means not significant

ratio = exp(Difference) = ratio of median intensity of zone 3 to median intensity of zone 1

lwrRatio = exp(Difference – LSD) (lower limit of 95% confidence interval for ratio of medians)

uprRatio = exp(Difference + LSD) (upper limit of 95% confidence interval for ratio of medians)

Note: if range of values between lwrRatio and uprRatio includes 1, usually means not significant

**Table 5 - Findings comparing intensity of fluorescence in PT and CV makers.**

| Marker | Difference | SED    | t      | LSD    | lwr    | upr    | p      | Ratio       | lwrRatio    | uprRatio    |
|--------|------------|--------|--------|--------|--------|--------|--------|-------------|-------------|-------------|
| CD146  | 1.428      | 0.2275 | 6.2772 | 0.4879 | 0.9401 | 1.9159 | 0.0000 | 4.170350145 | 2.560237429 | 6.793049791 |

|         |        |        |        |        |        |        |        |             |             |             |
|---------|--------|--------|--------|--------|--------|--------|--------|-------------|-------------|-------------|
| aSMA    | 0.6675 | 0.1958 | 3.4096 | 0.4199 | 0.2476 | 1.0874 | 0.0042 | 1.949357829 | 1.280947451 | 2.966551004 |
| Laminin | 1.1238 | 0.2519 | 4.4609 | 0.5403 | 0.5835 | 1.6641 | 0.0005 | 3.076522806 | 1.792300518 | 5.280918284 |

Difference = mean Intensity PT - mean Intensity zone CV

SED = standard error of the difference between the means

$t = \text{Difference} / \text{SED}$

LSD = least significant difference is the minimum absolute difference between a pair of means in order for them to be considered statistically significant at the 0.05 level.

$\text{lwr} = \text{Difference} - \text{LSD}$  (lower limit of 95% confidence interval for difference between pair of means)

$\text{upr} = \text{Difference} + \text{LSD}$  (upper limit of 95% confidence interval for difference between pair of means)

Note: if range of values between lwr and upr includes zero, usually means not significant

$\text{ratio} = \exp(\text{Difference})$  = ratio of median intensity of PT to median intensity of CV

$\text{lwrRatio} = \exp(\text{Difference} - \text{LSD})$  (lower limit of 95% confidence interval for ratio of medians)

$\text{uprRatio} = \exp(\text{Difference} + \text{LSD})$  (upper limit of 95% confidence interval for ratio of medians)

Note: if range of values between lwrRatio and uprRatio includes 1, usually means not significant
